# Supplementary material for: Homoleptic mer-Ir(iii) complexes for highly efficient solution-processable green phosphorescent organic light-emitting diodes with high current efficiency
Source: Royal Society of Chemistry journal article supplement (doi:10.1039/d0tc00619j), 2020-01-01
Supplement: d0tc00619j1.pdf [file d0tc00619j1.pdf]

**Supporting Information**

**Homoleptic *mer*-Ir(III) complexes for highly efficient solution-processable green phosphorescent organic light-emitting diodes with high current efficiency**

Athithan Maheshwaran,<sup>a</sup> Vijaya Gopalan Sree,<sup>a</sup> Raja Kumaresan,<sup>a</sup> Ho-Yeol Park,<sup>a</sup> Jungmin Choi,<sup>a</sup>

Kyungmin Sung,<sup>a</sup> Jee Jesung\*<sup>a</sup> and Sung-Ho Jin\*<sup>a</sup>

A. Maheshwaran, Dr. V. G. Sree, R. Kumaresan, H-Y Park, J. Choi, K. Sung, Jee. J, Prof. S.-H. Jin

<sup>a</sup>Department of Chemistry Education, Graduate Department of Chemical Materials, Institute for Plastic Information and Energy Materials, Pusan National University, Busandaehakro 63-2, Busan 46241, Republic of Korea

E-mail: [jjis@kpxls.com](mailto:jjis@kpxls.com), [shjin@pusan.ac.kr](mailto:shjin@pusan.ac.kr)

## General information

All reagents and solvent were purchased from Aldrich Chemical Co. and Alfa Aesar and, used without further purification. All reactions were carried out in an inert and dry environment under anhydrous nitrogen ( $N_2$ ) which was dried by passing through a column of calcium sulfate.  $^1H$  and  $^{13}C$  NMR spectra were recorded on a Varian Mercury Plus 600 MHz spectrometer in  $CDCl_3$  using tetramethylsilane as an internal reference. The chemical shifts were reported in ppm relative to the singlet of  $CDCl_3$  at 7.26 and 77 ppm for the  $^1H$  and  $^{13}C$  NMR, respectively. UV-visible and the emission spectra were recorded with a JASCO V-570 and Hitachi F-4500 fluorescence spectrophotometers at room temperature. The absolute PLQYs of the doped films were measured using spectrofluorometer with an integrating sphere system (JASCO FP-8500) under an inert atmosphere. Thermal analysis was carried out on a Mettler Toledo TGA/SDTA 851e analyzer under  $N_2$  atmosphere at a heating rate of  $10\text{ }^\circ\text{C min}^{-1}$ . CV studies were carried out with a CHI 600C potentiostat (CH Instruments) at a scan rate of  $100\text{ mV s}^{-1}$  in an anhydrous  $CH_2Cl_2$  solvent with 0.1 M  $TBAClO_4$  as supporting electrolyte. A platinum wire was used as the counter electrode and an  $Ag/AgCl$  electrode was used as the reference electrode. The potentials were referenced to the ferrocene/ferrocenium redox couple ( $Fc/Fc^+$ ). The purity of the Ir(III) complexes were determined by high-performance liquid chromatography (HPLC) carried out using from Agilent instruments.



(b)

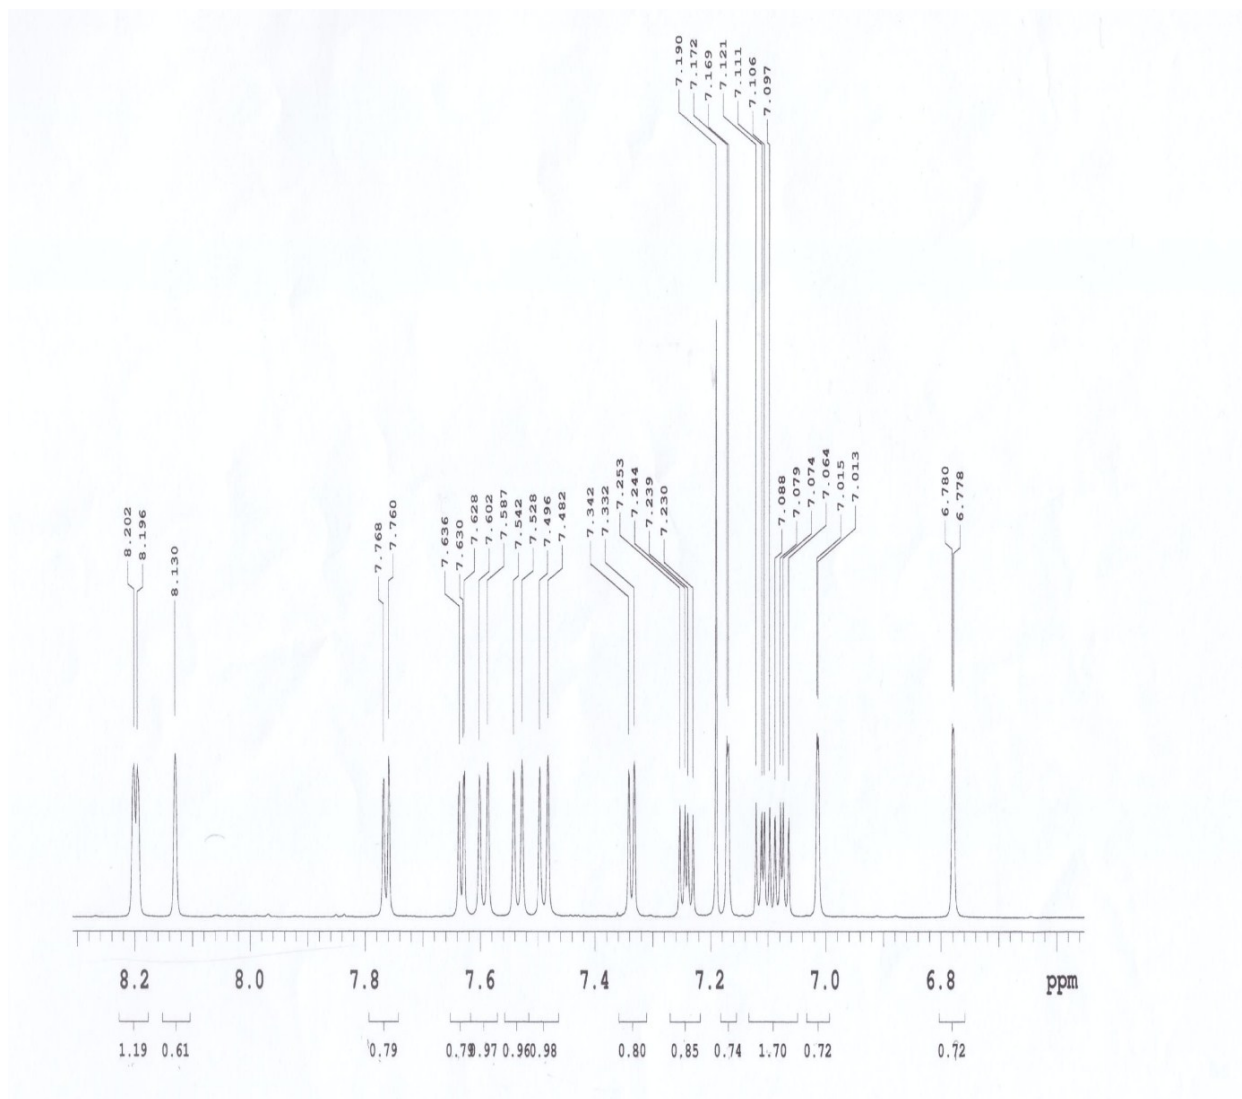

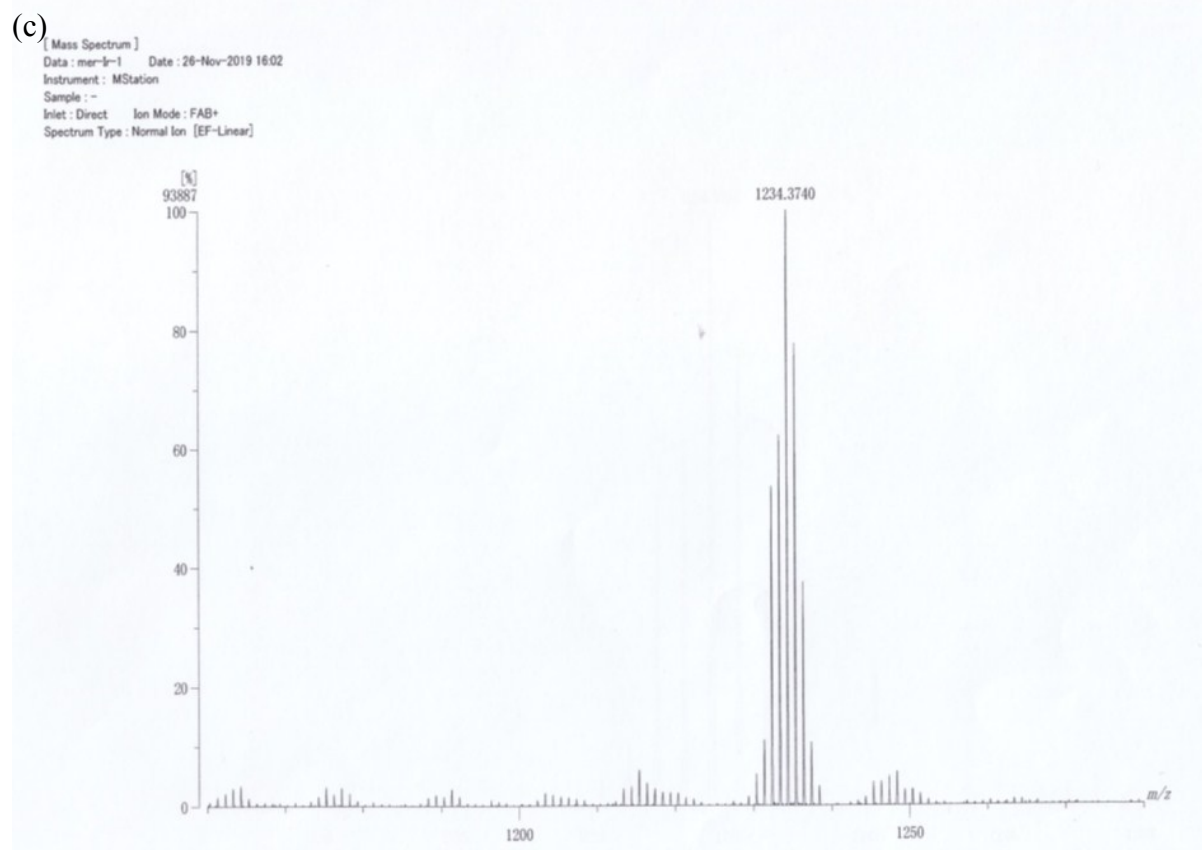

**Fig. S1** a)  $^1\text{H}$  NMR spectrum of *mer-Ir1* b) Aromatic region c) Mass spectrum of *mer-Ir1*.

(a)

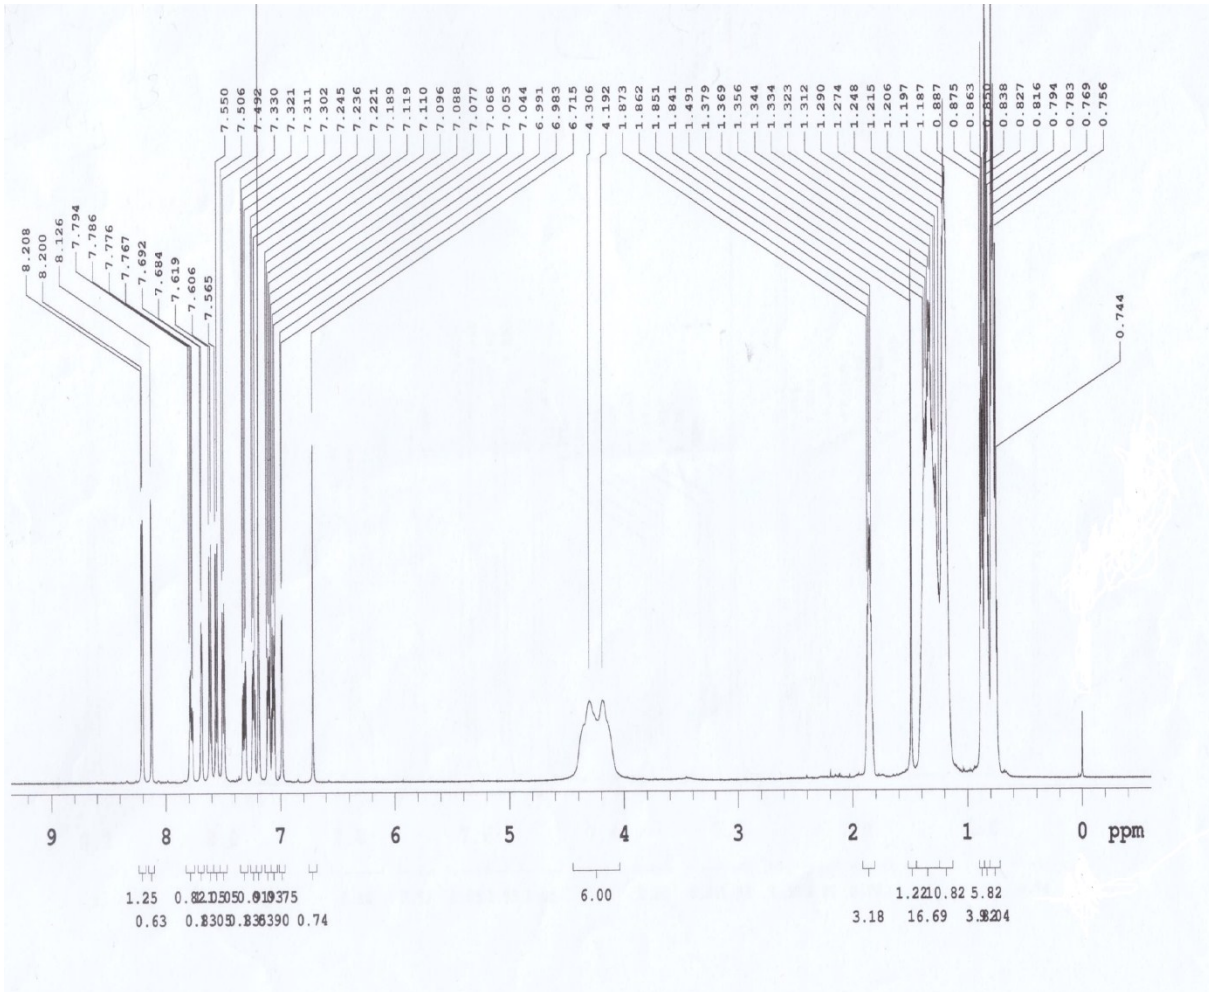

(b)

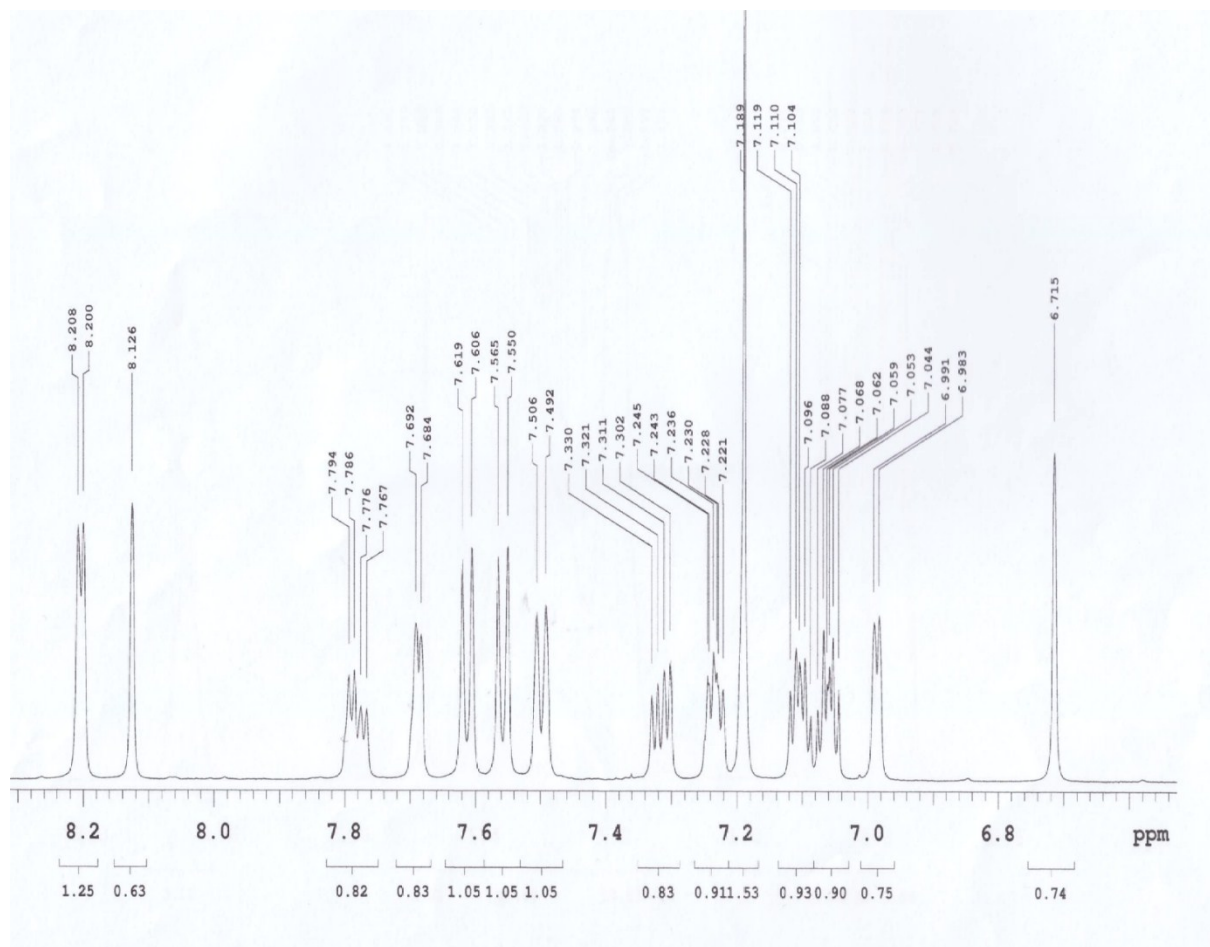

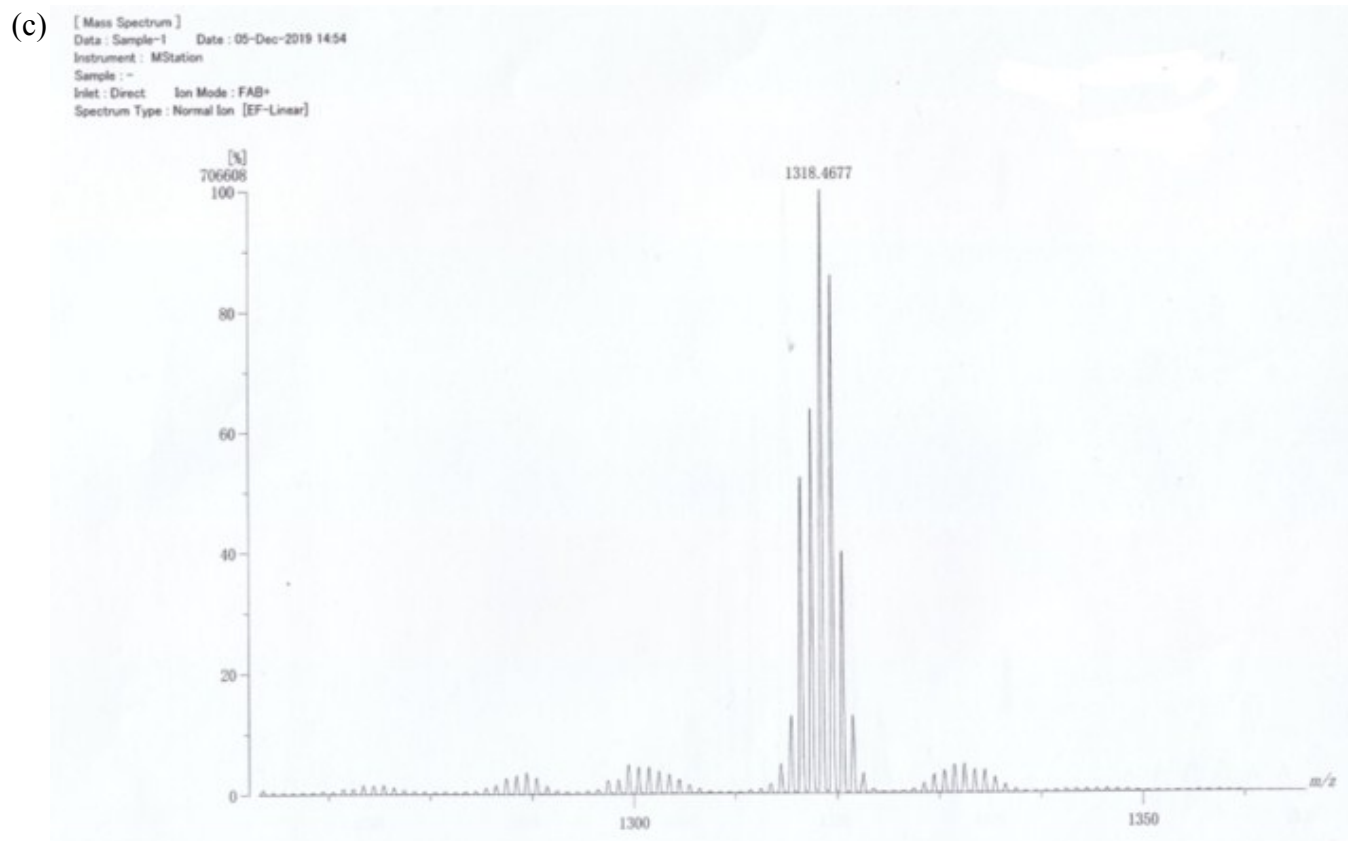

Fig. S2 a)  $^1\text{H}$  NMR spectrum of *mer-Ir2* b) Aromatic region and c) Mass spectrum of *mer-Ir2*.



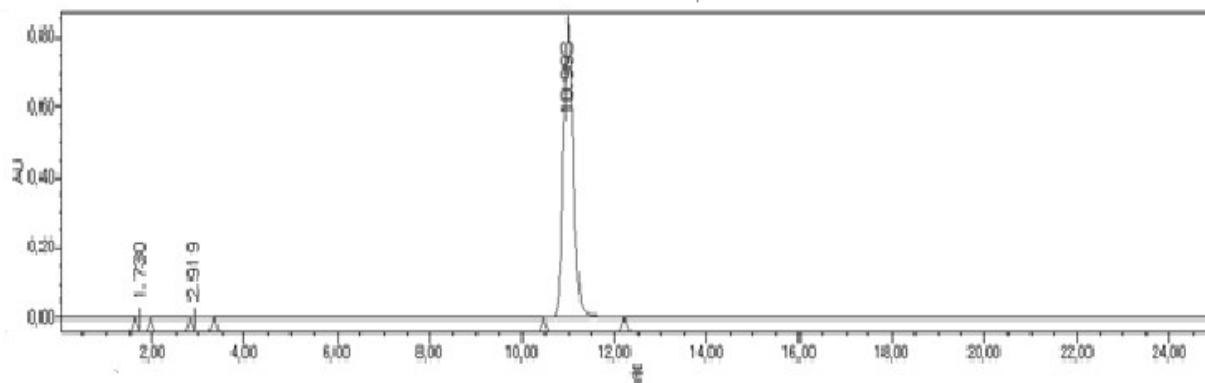

| 이름 | 머무름 시간<br>(분) | 면적<br>(uv+소) | % 면적  | 높이<br>(uv) | 적분 타입 | 영 | 단위 | 피크 타입 | 피크 코드 |
|----|---------------|--------------|-------|------------|-------|---|----|-------|-------|
|    | 1.730         | 12614        | 0.10  | 1518       | BB    |   |    | 미지    |       |
|    | 2.919         | 3496         | 0.03  | 332        | BB    |   |    | 미지    |       |
|    | 10.993        | 1399789      | 99.88 | 830062     | BB    |   |    | 미지    |       |

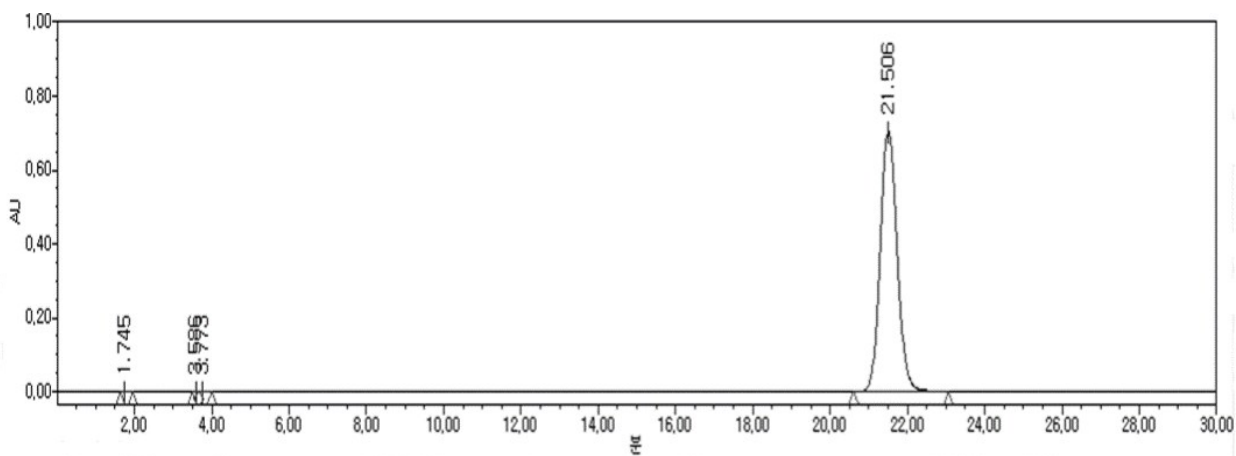

| 이름 | 머무름 시간<br>(분) | 면적<br>(uv+소) | % 면적  | 높이<br>(uv) | 적분 타입 | 영 | 단위 | 피크 타입 | 피크 코드 |
|----|---------------|--------------|-------|------------|-------|---|----|-------|-------|
|    | 1.745         | 10227        | 0.05  | 1294       | BB    |   |    | 미지    |       |
|    | 3.586         | 5011         | 0.02  | 1368       | BV    |   |    | 미지    |       |
|    | 3.773         | 9872         | 0.05  | 1475       | VB    |   |    | 미지    |       |
|    | 21.506        | 21478864     | 99.88 | 706163     | BB    |   |    | 미지    |       |

Fig. S3 HPLC spectra of compound *mer-Ir1* and *mer-Ir2*.

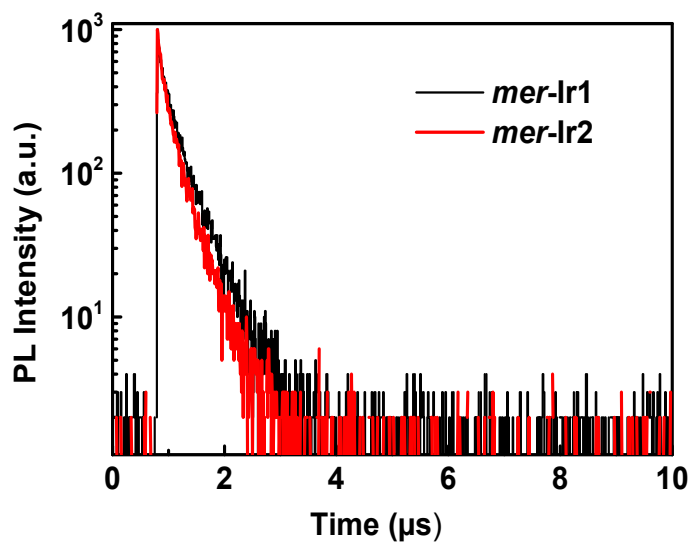

Fig. S4. Transient PL curves of *mer-Ir1* and *mer-Ir2*.

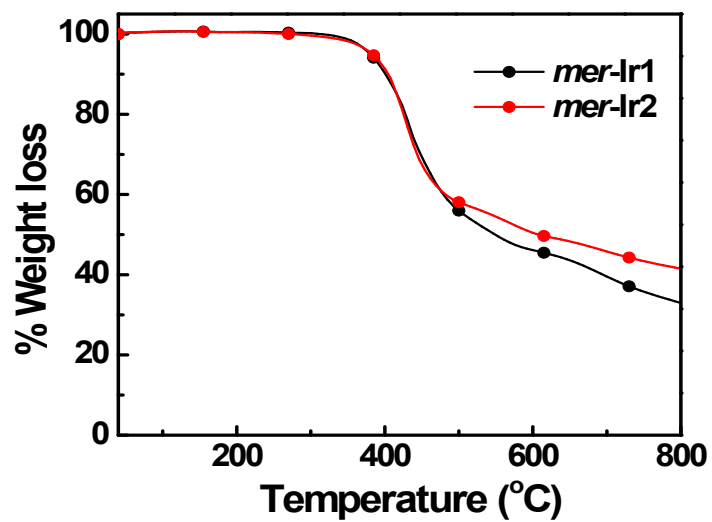

Fig. S5. TGA curves of *mer-Ir1* and *mer-Ir2*.

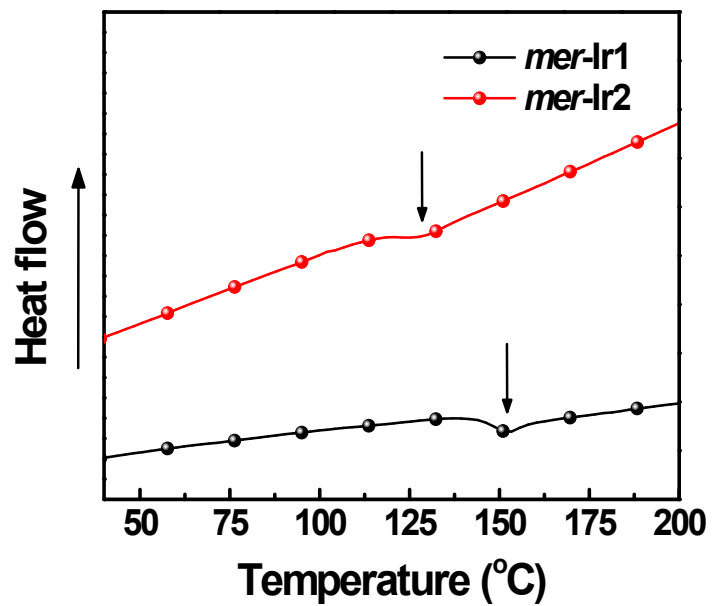

Fig. S6. DSC curves of *mer-Ir1* and *mer-Ir2*.

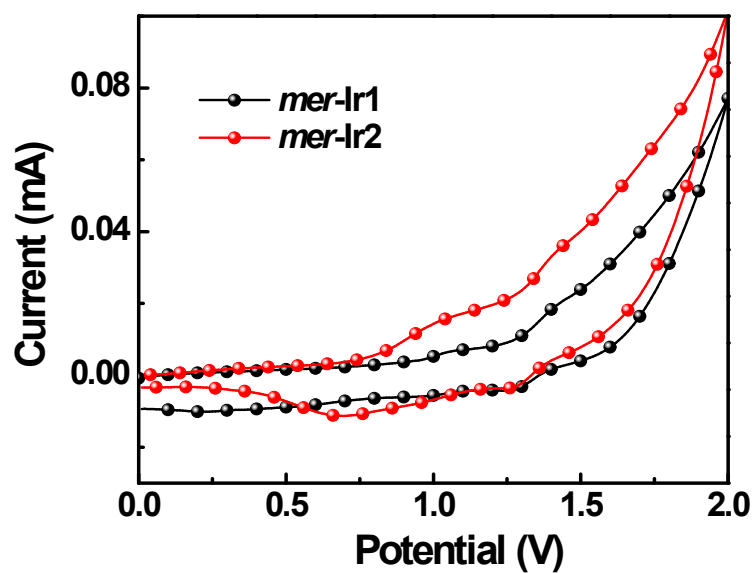

Fig. S7. Cyclic voltammetry curves of *mer-Ir1* and *mer-Ir2*.

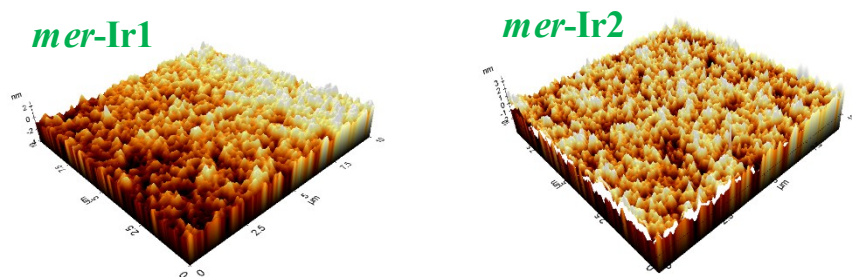

**Fig. S8.** Surface morphologies of solution processed films.

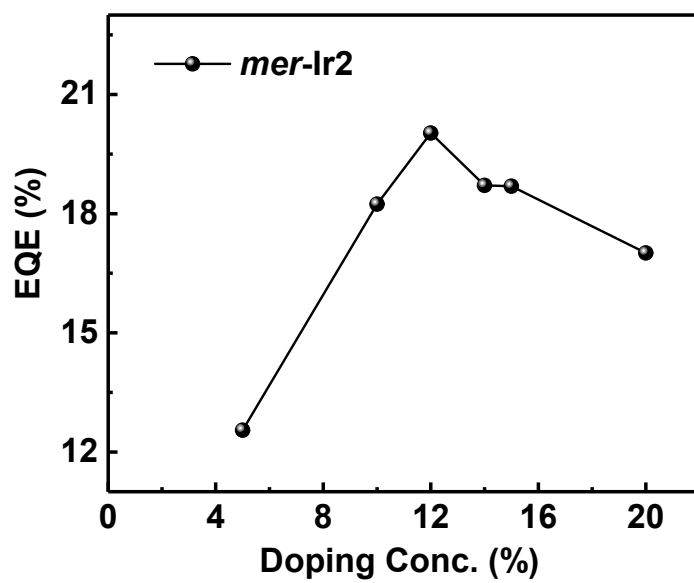

**Fig. S9.** EQE measured for different doping concentrations of *mer-Ir2* complex.

**Table S1.** Literature summary of homoleptic green PHOLEDs via solution-processed.

| Green Phosphors                   | EQE <sub>max</sub> (%) | CE <sub>max</sub> (cd/A) | Reference        |
|-----------------------------------|------------------------|--------------------------|------------------|
| <b><i>mer-Ir2</i></b>             | <b>20.03</b>           | <b>67.81</b>             | <b>This work</b> |
| <i>fac-G0</i>                     | 18.1                   | 62                       | [1]              |
| <i>fac-Ir(mppy)<sub>3</sub></i>   | 16.3                   | 56.9                     | [2]              |
| <i>fac-1c</i>                     | 12                     | 40                       | [3]              |
| <i>fac-Ir(ppy)<sub>3</sub></i>    | 15                     | 56.8                     | [4]              |
| <i>fac-Ir(ppy)<sub>3</sub></i>    | -                      | 27.4                     | [5]              |
| <i>fac-Ir(ppy)<sub>3</sub></i>    | -                      | 27.3                     | [6]              |
| <i>fac-Ir(mppy)<sub>3</sub></i>   | 22                     | 69                       | [7]              |
| <i>fac-3c</i>                     | 12.9                   | 37.6                     | [8]              |
| <i>fac-G1</i>                     | 15                     | 51.8                     | [9]              |
| <i>fac-Ir-3Tz1F</i>               | 15.8                   | 56.2                     | [10]             |
| <i>fac-Ir(ppy)<sub>3</sub></i>    | -                      | 42                       | [11]             |
| <i>fac-Ir(ppy-Cz)<sub>3</sub></i> | 7.8                    | 23.0                     | [12]             |
| <i>fac-Ir(ppy)<sub>3</sub></i>    | 11.4                   | 38.71                    | [13]             |

## References

1. S. Wang, X. Wang, B. Yao, B. Zhang, J. Ding, Z. Xie, L. Wang, *Sci. Rep.*, 2015, **5**, 12487.
2. J. Chen, C. Shi, Q. Fu, F. Zhao, Y. Hu, Y. Feng, D. Ma, *J. Mater. Chem.*, 2012, **22**, 5164.
3. M. Tavasli, T. N. Moore, Y. Zheng, M. R. Bryce, M. A. Fox, G. C. Griffiths, V. Jankus, H. A. A.-Attar, A. P. Monkman, *J. Mater. Chem.*, 2012, **22**, 6419.
4. M. Zhu, T. Ye, X. He, X. Cao, C. Zhong, D. Ma, J. Qin, C. Yang, *J. Mater. Chem.*, 2011, **21**, 9326.
5. Z. Ge, T. Hayakawa, S. Ando, M. Ueda, T. Akiike, H. Miyamoto, T. Kajita, M.-A. Kakimoto, *Chem. Mater.*, 2008, **20**, 2532.
6. Z. Ge, T. Hayakawa, S. Ando, M. Ueda, T. Akiike, H. Miyamoto, T. Kajita, M.-A. Kakimoto, *Adv. Funct. Mater.*, 2008, **18**, 584.
7. M. Cai, T. Xiao, E. Hellerich, Y. Chen, R. Shinar, J. Shinar, *Adv. Mater.*, 2011, **23**, 3590.
8. Y. Kim, S. Park, Y. H. Lee, J. Jung, S. Yoo, M. H. Lee, *Inorg. Chem.*, 2016, **55**, 909.
9. J. Ding, J. Gao, Y. Cheng, Z. Xie, L. Wang, D. Ma, X. Jing, F. Wang, *Adv. Funct. Mater.*, 2006, **16**, 575.
10. H. Guo, J. Zhao, Z. Tian, Y. Wu, B. Liu, F. Dang, X. Yang, G. Zhou, Z. Wu, W.-Y. Wong, *J. Mater. Chem. C*, 2017, **5**, 208.
11. C.-C. Lee, C.-H. Yuan, S.-W. Liu, L.-A. Liu, Y.-S. Chen, *J. Disp. Technol.*, 2011, **7**, 636.
12. M. J. Cho, J.-I. Jin, D. H. Choi, Y. M. Kim, Y. W. Park, B.-K. Ju, *Dyes Pigm.*, 2009, **83**, 218.
13. J. Li, T. Zhang, Y. Liang, R. Yang, *Adv. Funct. Mater.*, 2013, **23**, 619.
